# Supplementary material for: Responses of Free-Living Planktonic Bacterial Communities to Experimental Acidification and Warming
Source: MDPI journal article supplement (doi:10.3390/microorganisms11020273), 2023-01-20
Supplement: s1 [file s1]

## APPENDIX

### Supplementary Figures

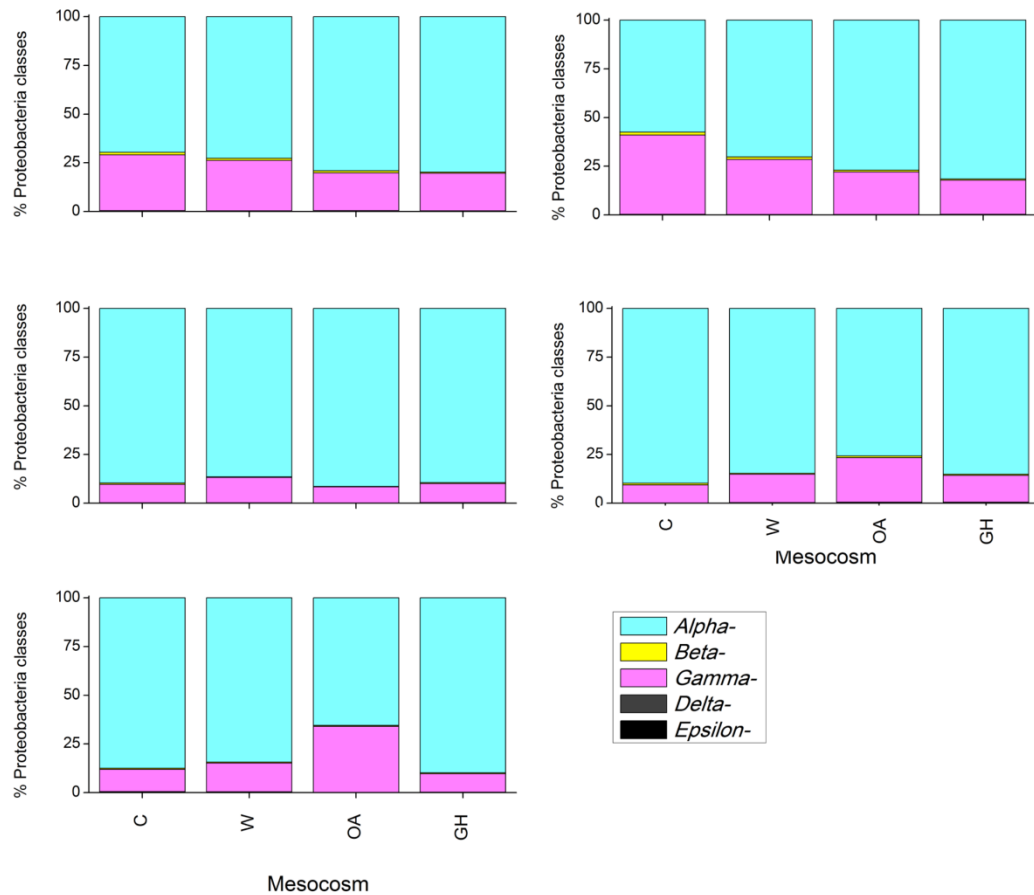

**Supplementary Figure S1.** Percentage contribution of Proteobacteria classes in the mesocosms at T-1, T0, T3, T6 and T10 at the  $>0.2 \mu\text{m}$  fraction (over the total Proteobacteria reads). Delta- and *Epsilonproteobacteria* never exceeded 0.5 and 0.02% of the Proteobacterial reads, respectively. *C*: control mesocosms, *W*: mesocosms where temperature was increased by  $3^\circ\text{C}$  (named after warming), *OA*: mesocosms where pH was decreased by 0.3 units (named after ocean acidification), *GH*: mesocosms where temperature was increased by  $3^\circ\text{C}$  and pH was decreased by 0.3 units (named after greenhouse).
